# Supplementary material for: The Genetic Basis of Pollinator Adaptation in a Sexually Deceptive Orchid
Source: PLoS Genet. 2012 Aug 16;8(8):e1002889. doi: 10.1371/journal.pgen.1002889 (PMC3420943; doi:10.1371/journal.pgen.1002889)
Supplement: Table S1 — Number of sequences in a given allele group in which frame-shift or stop codon mutations were found. All sequences were classified into two groups: putatively functional and nonfunctional, based on whether frame-shifts/stop codons were observed. Asterisks indicate the proportion of nonfunctional sequences where significantly higher than expected, using Fisher's exact test [p cut-off value 0.05]. (XLS) [file pgen.1002889.s006.xls]

## Sheet: Sheet1
	SAD1-A	SAD1-B	SAD2-A	SAD2-B	SAD2-C	SAD2-D *	SAD3	SAD4	SAD5-A	SAD5-B	SAD6-A	SAD6-B *
Functional	21	77	50	25	2	0	64	80	16	4	9	20
Non-functional	1	4	1	2	1	6	3	3	2	1	0	11
Total	24	79	51	27	3	6	67	83	18	5	9	31
