# Supplementary material for: The Genetic Basis of Pollinator Adaptation in a Sexually Deceptive Orchid
Source: PLoS Genet. 2012 Aug 16;8(8):e1002889. doi: 10.1371/journal.pgen.1002889 (PMC3420943; doi:10.1371/journal.pgen.1002889)
Supplement: Table S3 — Plant samples collected in this study. Numbers in cells refer to the number of individuals. Hybrid refers to F1 hybrids between O. sphegodes and O. exaltata as assigned based on AFLP data in previous study [17]. Location information for each population is given in the main text. (XLS) [file pgen.1002889.s008.xls]

## Sheet: Sheet1
Species / Population	CAP	FCG	MDL	SPF
O. exaltata	6	1	6	3
O. garganica	5	/	/	/
O. sphegodes	7	5	/	/
Hybrid	/	2	/	/
