# Supplementary material for: The Genetic Basis of Pollinator Adaptation in a Sexually Deceptive Orchid
Source: PLoS Genet. 2012 Aug 16;8(8):e1002889. doi: 10.1371/journal.pgen.1002889 (PMC3420943; doi:10.1371/journal.pgen.1002889)
Supplement: Table S4 — Oligonucleotides used in this study. For primers compatible with Gateway (Invitrogen) cloning, the full attB sites were introduced as described in Invitrogen's manuals. TA refers to the annealing temperature used for PCR reactions. (XLS) [file pgen.1002889.s009.xls]

## Sheet: Sheet1
Primer name	Gene	Sequences (5'->3')	TA (°C)	Experiment	Purpose/Comments
SADN5-538F	SAD4/5/6	GGTGGACTGCCGAAGAGAACC	55	3'RACE 1st PCR
SADN5-575F	SAD4/5/6	TGCTGAAGCAGTATCTGTATCTCTC	55	3'RACE 2nd PCR
SADN5-698R	SAD4/5/6	CCGCTCTTGGAAGGAGGTGTAG	55	5'RACE 1st PCR
SADN5-678R	SAD4/5/6	AGGTGTAGATGAATCCCATGAACG	55	5'RACE 2nd PCR
FAttB1-SAD1f-fs*	SAD1	GGGGACAAGTTTGTACAAAAAAGCAGGCTACATGGAACTTCACCTTGCACTAC*T	58	RT-PCR	* = phosphorothioate bond
FAttB2-SAD1r-fs	SAD1	GGGGACCACTTTGTACAAGAAAGCTGGGTaCACGCGGACCTGCTTGTTGAATATCC	58	RT-PCR
FAttB1-SAD2f-fs*	SAD2	GGGGACAAGTTTGTACAAAAAAGCAGGCTACATGGAACTTCACCTTGCACTAC*G	58	RT-PCR	* = phosphorothioate bond
FAttB2-SAD2r-fs	SAD2	GGGGACCACTTTGTACAAGAAAGCTGGGTaCACGCRGACTTGCTTATTGAATATCC	58	RT-PCR
FAttb1-SAD3f-fs	SAD3	GGGGACAAGTTTGTACAAAAAAGCAGGCTAACGAACAGTAGGAGAAGGAGAACAAC	58	RT-PCR
FAttb2-SAD3r-fs	SAD3	GGGGACCACTTTGTACAAGAAAGCTGGGTTTCAAAGCATCACTTCCCGGTC	58	RT-PCR
FAttb1-SAD4f-fs	SAD4	GGGGACAAGTTTGTACAAAAAAGCAGGCTACATGGCAATGATCGGCTTTCCAACA	58	RT-PCR
FAttb2-SAD4r-fs	SAD4	GGGGACCACTTTGTACAAGAAAGCTGGGTATCAAACCTGTACTTCCCTATCAA	58	RT-PCR
Fattb1-SAD5-141F	SAD5	GGGGACAAGTTTGTACAAAAAAGCAGGCTACGCACGAGGTAGAGGGACAAGTC	58	RT-PCR
FAttB2-SAD5r-fs	SAD5	GGGGACCACTTTGTACAAGAAAGCTGGGTATCAAACCTGYACYTCCCTGTTGAA	58	RT-PCR
SAD1-AlleleGroupA_F	SAD1	CAGCACTACATCCATCATCAACACT	60	Allelic gene expression	SAD1AlleleGoupA_F+SAD1AlleleGoupA_R: SAD1-A allele
SAD1-AlleleGroupB_F	SAD1	AACAGCACTACAACCATCAACCA	60	Allelic gene expression	SAD1AlleleGoupB_F+SAD1AlleleGoupB_R: SAD1-B allele
SAD1-AlleleGroupA_R	SAD1	CATCTCGCCGTAGTCTCTGACAC	60	Allelic gene expression
SAD1-AlleleGroupB_R	SAD1	CATCTCGCTGTAGTCTCCGACAG	60	Allelic gene expression
SAD2-AlleleGroupA_F	SAD2	AAAAAGCAGGCTAAATGGAACTTCACCTTGCACTACG	60	Allelic gene expression	SAD2-AlleleGroupA_F+SAD2-AlleleGroupA_R: SAD2-A/B allele
SAD2-AlleleGroupB_F	SAD2	CCTTGCACTACGTGTTATGCTTA	60	Allelic gene expression	SAD2-AlleleGroupB_F+SAD2-AlleleGroupA_R: SAD2-C allele
SAD2-AlleleGroupC_R	SAD2	TAGATGATTCCACACAAGGCGTT	60	Allelic gene expression	SAD2-AlleleGroupA_F+SAD2-AlleleGroupC_R: SAD2-D allele
SAD2-AlleleGroupA_R	SAD2	TAGATGAATCCACACAAGATGCTG	60	Allelic gene expression
SAD5-AlleleGroupA_F	SAD5	TGATAAGTTCTACGAGCAAACGGA	60	Allelic gene expression	SAD5-AlleleGroupA_F+SAD2-AlleleGroupA_R: SAD5-A allele
SAD5-AlleleGroupB_F	SAD5	GATTAAGGAGCTTCGGAAGCG	60	Allelic gene expression	SAD5-AlleleGroupB_F+SAD5-AlleleGroupA_R: SAD5-B and SAD6-A allele
SAD5-AlleleGroupC_F	SAD5	AGGAGCTTCGAAAGAGGGCTAAG	60	Allelic gene expression	SAD5-AlleleGroupC_F+SAD5-AlleleGroupA_R: SAD6-C allele
SAD5-AlleleGroupA_R	SAD5	ATCAGCATAGTCAGTGGCAGAGTAG	60
